# Supplementary material for: Characterization of combined linagliptin and Y2R agonist treatment in diet-induced obese mice
Source: PubMed Central journal article supplement (PMC8044192; doi:10.1038/s41598-021-87539-7), 2021-04-13
Supplement: 41598_2021_87539_MOESM1_ESM.pdf [file 41598_2021_87539_MOESM1_ESM.pdf]

## **Characterization of combined linagliptin and Y2R agonist treatment in diet-induced obese mice**

Henrik H Hansen<sup>1</sup>, Rikke V Grønlund<sup>1</sup>, Tamara Baader-Pagler<sup>2</sup>, Peter Haebel<sup>2</sup>, Harald Tammen<sup>3</sup>, Leif Kongskov Larsen<sup>1</sup>, Jacob Jelsing<sup>1</sup>, Niels Vrang<sup>1</sup>, Thomas Klein<sup>2</sup>

<sup>1</sup>Gubra, Hørsholm, Denmark; <sup>2</sup>Department of Cardiometabolic Diseases Research, Boehringer Ingelheim Pharma GmbH & Co., Biberach, Germany; <sup>3</sup>PXBioVisioN, Hannover, Germany.

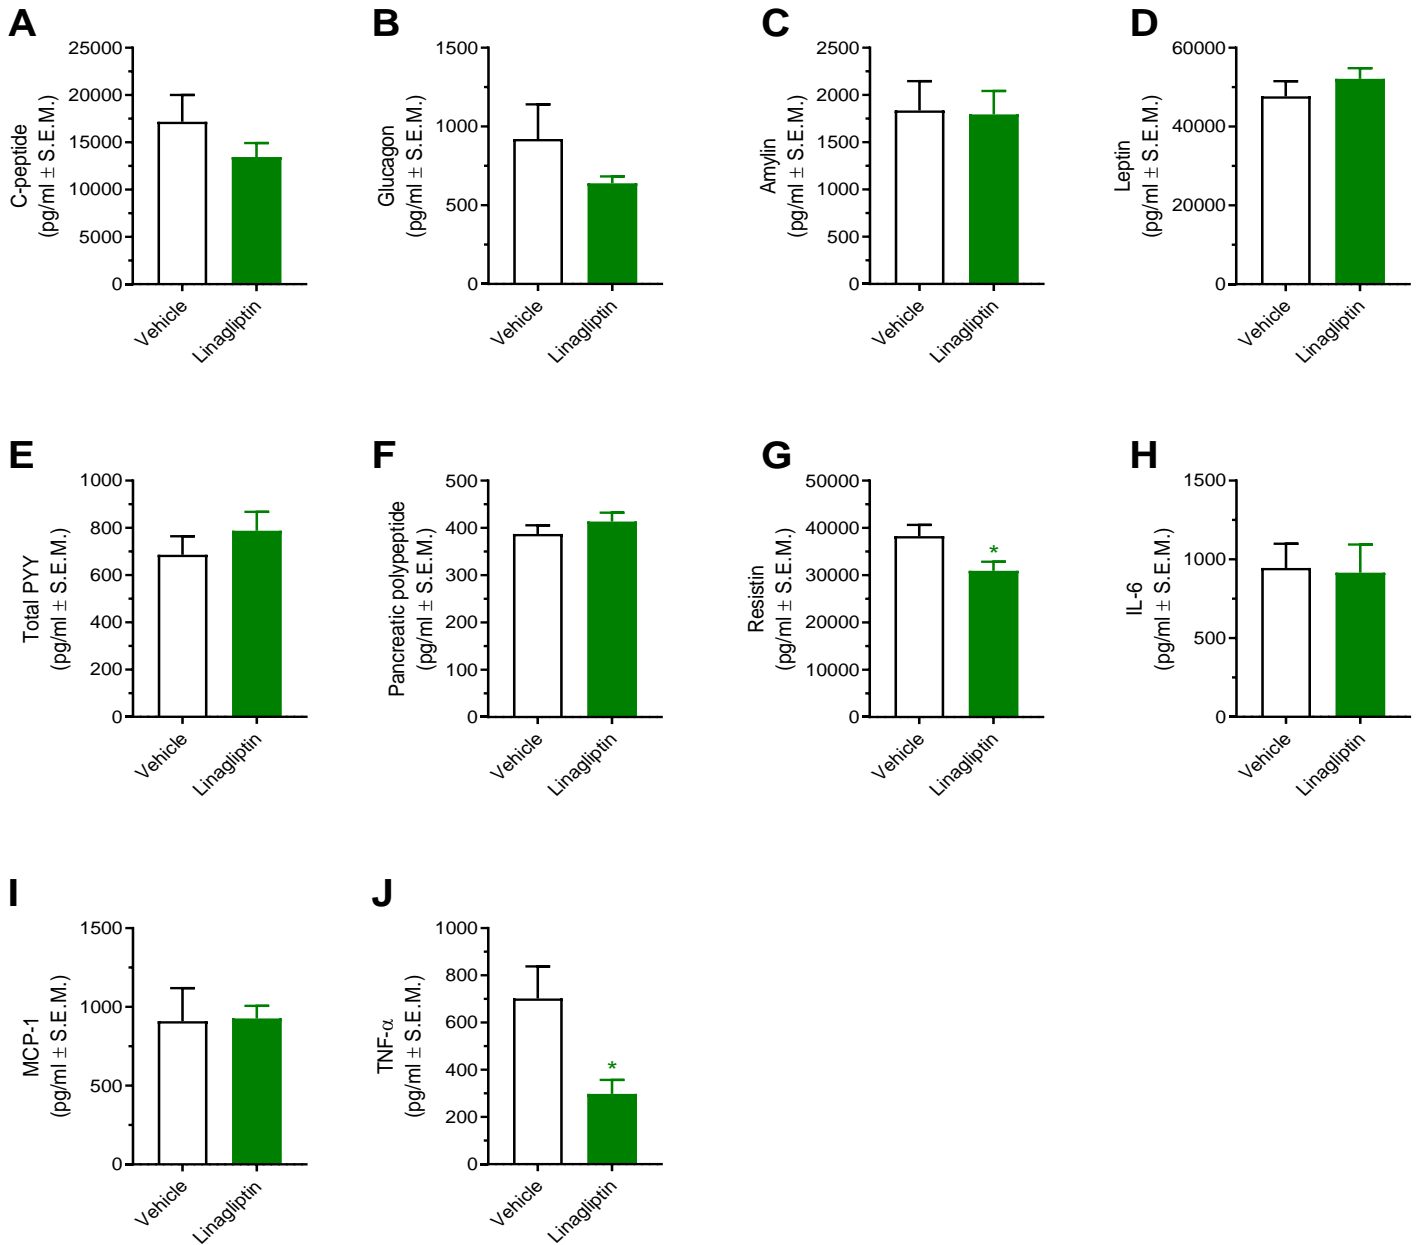

**Supplementary Figure 1.** Terminal (4hrs post-dosing) plasma concentrations of various metabolic markers in DIO mice following 14 days of treatment with vehicle (SC) or linagliptin (3 mg/kg/day, SC). **(A)** C-peptide, **(B)** Glucagon, **(C)** Amylin, **(D)** Leptin, **(E)** Total PYY, **(F)** Pancreatic polypeptide, **(G)** Resistin, **(H)** IL-6, **(I)** MCP-1, **(J)** TNF- $\alpha$ . \* $p < 0.05$  vs. vehicle control (unpaired t-test).
